# Supplementary material for: Designing high-performance n-type Mg3Sb2-based thermoelectric materials through forming solid solutions and biaxial strain
Source: Royal Society of Chemistry journal article supplement (doi:10.1039/c8ta07285j), 2018-01-01
Supplement: c8ta07285j1.pdf [file c8ta07285j1.pdf]

## Supporting Information

### Designing high-performance n-type $\text{Mg}_3\text{Sb}_2$ -based thermoelectric materials through forming solid solution and biaxial strain

Juan Li, Shuai Zhang, Boyi Wang, Shichao Liu, Luo Yue, Guiwu Lu and Shuqi Zheng\*

State Key Laboratory of Heavy Oil Processing, College of New Energy and Materials, China

University of Petroleum, Beijing 102249, People's Republic of China

## Supplementary Figures

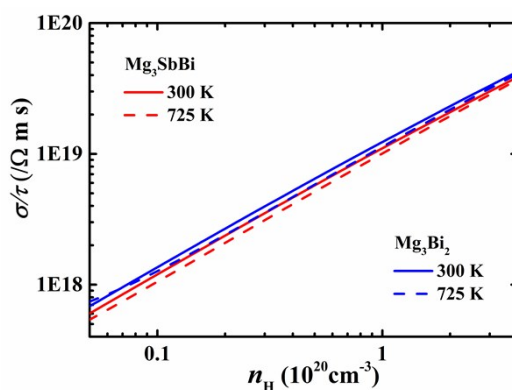

**Fig. S1** Calculated electrical conductivity  $\sigma/\tau$  as a function of Hall carrier concentration for  $\text{Mg}_3\text{SbBi}$  (red lines) and  $\text{Mg}_3\text{Bi}_2$  (blue lines), respectively at 300 K (solid lines) and 725 K (dash lines).

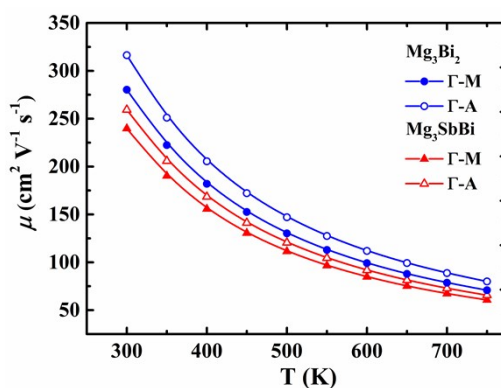

\* Corresponding author. Tel: +86 010 89733200; Fax: +86 010 89733973.  
E-mail: [zhengsq09@163.com](mailto:zhengsq09@163.com) (Shuqi Zheng).

**Fig. S2** Temperature dependence of the carrier mobility  $\mu$  for  $\text{Mg}_3\text{SbBi}$  (red triangles) and  $\text{Mg}_3\text{Bi}_2$  (blue circulars). Hollow and solid points represent the simulated results along  $\Gamma - \text{M}$  direction and  $\Gamma - \text{A}$  direction, respectively. The solid lines represent fitted curves using a  $B$  spline.

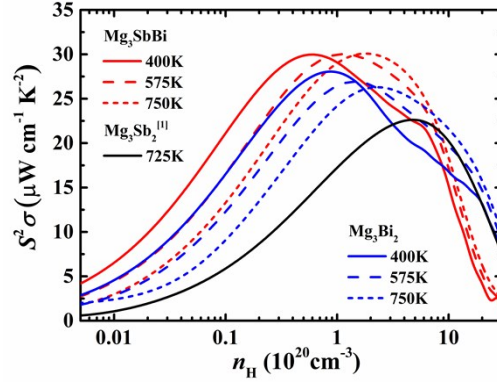

**Fig. S3** Calculated power factor  $S^2\sigma$  as a function of Hall carrier concentration for  $\text{Mg}_3\text{SbBi}$  (red lines) and  $\text{Mg}_3\text{Bi}_2$  (blue lines), respectively at 400 K (solid lines), 575 K (dash lines) and 725 K (short dash lines), and the comparison with the reported  $\text{Mg}_3\text{Sb}_2^{\text{I}}$  (black line).

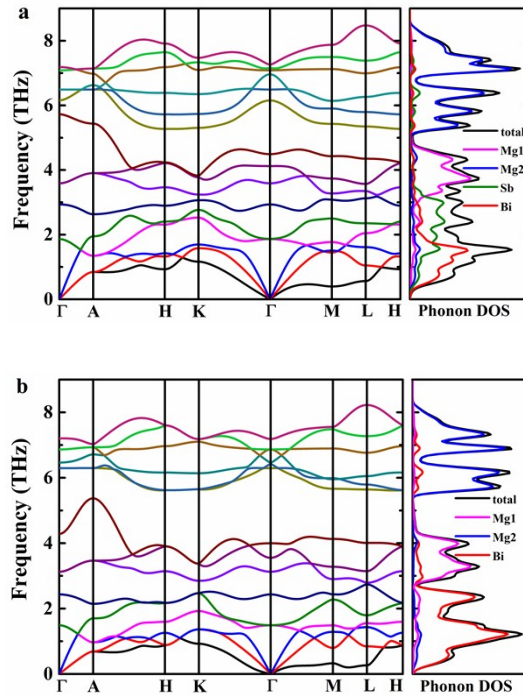

**Fig. S4** Calculated phonon spectra and DOS of (a)  $\text{Mg}_3\text{SbBi}$  and (b)  $\text{Mg}_3\text{Bi}_2$ .

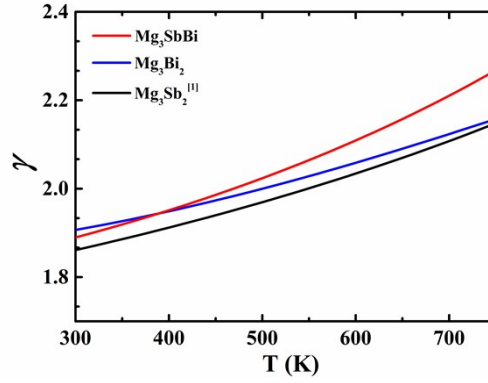

**Fig. S5** Temperature dependence of the Grüneisen parameters of  $\text{Mg}_3\text{SbBi}$  and  $\text{Mg}_3\text{Bi}_2$  and the comparison with  $\text{Mg}_3\text{Sb}_2$ .<sup>1</sup>

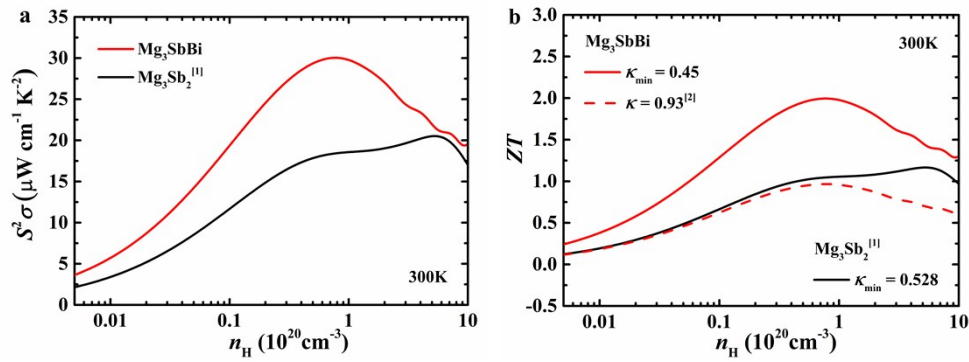

**Fig. S6** (a) Calculated power factor  $S^2\sigma$  and (b)  $ZT$  values versus Hall carrier concentration at 300 K for  $\text{Mg}_3\text{SbBi}$  (red lines). In (b), the dash and solid red lines represent the simulated  $ZT$  by using the experimental total thermal conductivity ( $\text{W m}^{-1} \text{K}^{-1}$ ) from ref. 2 and the calculated minimum thermal conductivity ( $\text{W m}^{-1} \text{K}^{-1}$ ), respectively. In (a) and (b), the reported n-type  $\text{Mg}_3\text{Sb}_2$  at 300 K (black lines) are plotted for comparison.

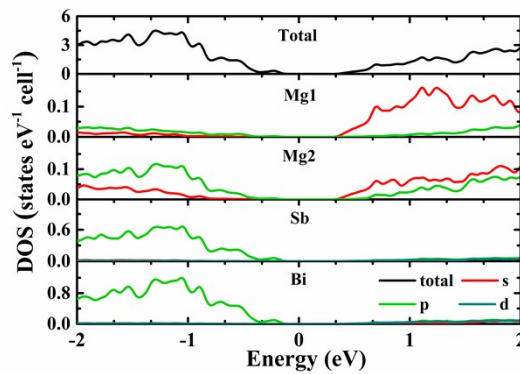

**Fig. S7** Calculated total and partial DOS of  $\text{Mg}_3\text{SbBi}$ .

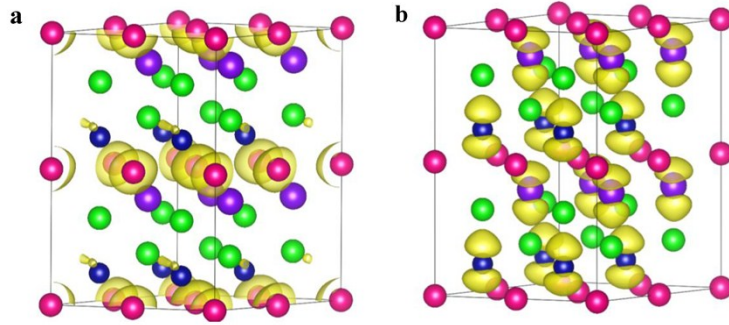

**Fig. S8** Calculated band-decomposed charge density of (a) conduction band minimum (CBM), isosurface value 0.0008, and (b) valence band maximum (VBM), isosurface value 0.0008. Pink, green, blue and purple balls represent Mg1, Mg2, Sb and Bi atoms, respectively.

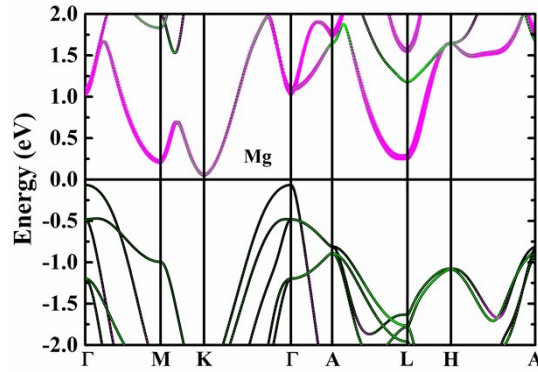

**Fig. S9** Orbital-projected band structure of the Mg atom of Mg<sub>3</sub>Sb<sub>2</sub>. The magenta and green points represent s and p orbitals, respectively.

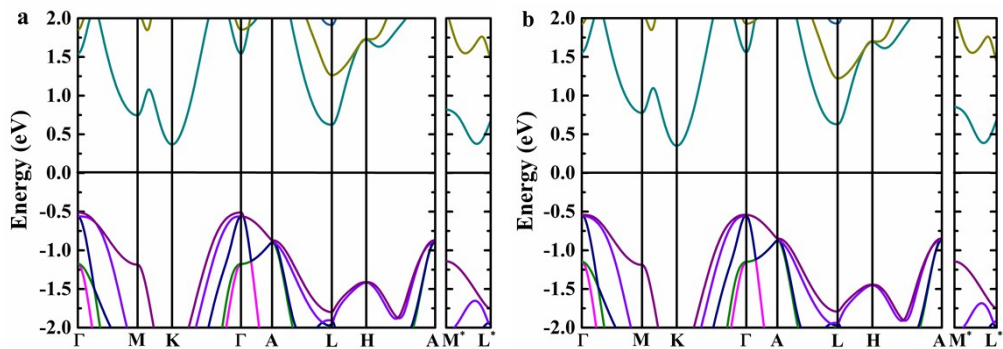

**Fig. S10** Electronic band structures with (a) biaxial strain -2.5% ( $\Delta E_{\text{K-CB}_1} \approx 0$ ) and (b) biaxial strain -3% ( $\Delta E_{\Gamma} \approx 0$ ) for Mg<sub>3</sub>Sb<sub>2</sub>.

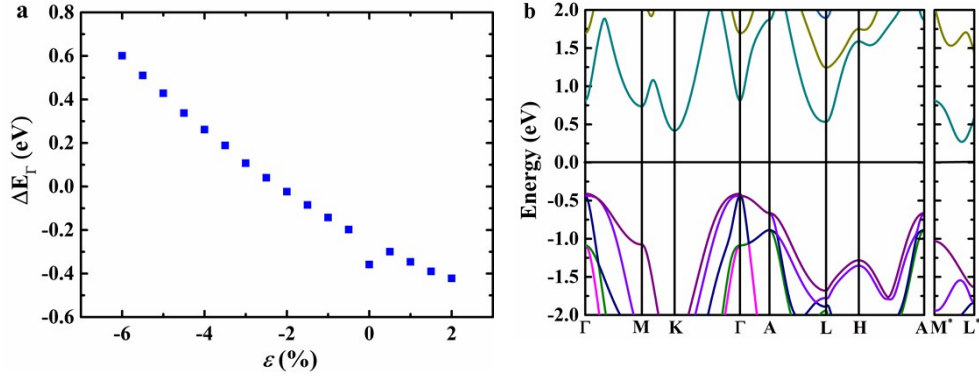

**Fig. S11** (a) The energy difference  $\Delta E_{\Gamma}$  between  $\Gamma(p_{x,y})$  band and  $\Gamma(p_z)$  band versus biaxial strain  $\epsilon$  in  $Mg_3SbBi$ . (b) Electronic band structure with nearly zero  $\Delta E_{\Gamma}$  at biaxial strain -2% in  $Mg_3SbBi$ .

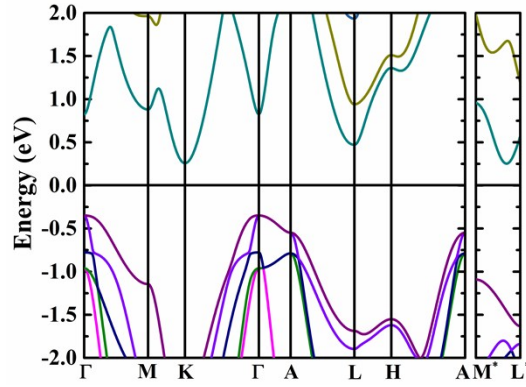

**Fig. S12** Electronic band structure with nearly zero  $\Delta E_{K-CB_1}$  at biaxial strain -5% in  $Mg_3SbBi$ .

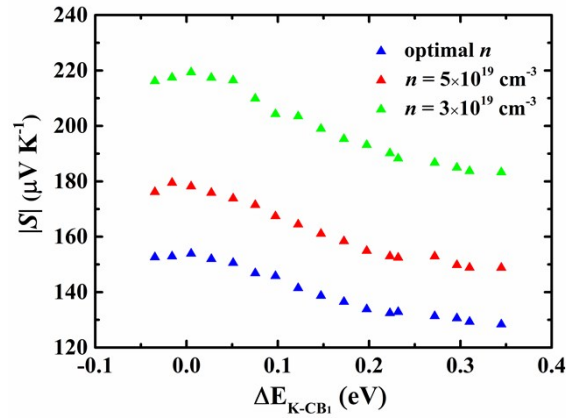

**Fig. S13** Calculated absolute value of Seebeck coefficient  $|S|$  of  $Mg_3SbBi$  at 300 K as a function of the energy difference  $\Delta E_{K-CB_1}$  at varying carrier concentrations.

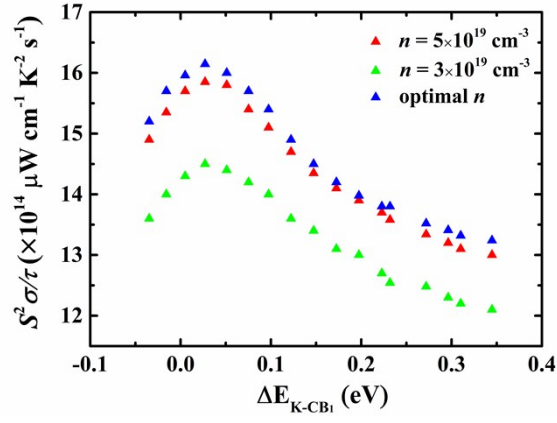

**Fig. S14** Calculated power factor  $S^2\sigma/\tau$  of  $\text{Mg}_3\text{SbBi}$  at 300 K as a function of  $\Delta E_{K-CB_1}$  at varying carrier concentrations.

## Supplementary Table

**Table S1** Calculated electronic and thermal transport parameters for Mg<sub>3</sub>SbBi and Mg<sub>3</sub>Bi<sub>2</sub>.

| Parameters                                                                                                                  | Mg <sub>3</sub> SbBi        | Mg <sub>3</sub> Bi <sub>2</sub>                   |
|-----------------------------------------------------------------------------------------------------------------------------|-----------------------------|---------------------------------------------------|
| Lattice constant <i>a</i> (Å)                                                                                               | 4.608 (4.608 <sup>a</sup> ) | 4.666 (4.666 <sup>b</sup> )                       |
| <i>c</i> (Å)                                                                                                                | 7.315 (7.315 <sup>a</sup> ) | 7.401 (7.401 <sup>b</sup> )                       |
| Band gap (eV)                                                                                                               | 0.4447                      | 0.30941(0.15 <sup>c</sup> , 0.2520 <sup>d</sup> ) |
| Effective mass ( $m_{xx}/m_e$ , $m_{yy}/m_e$ , $m_{zz}/m_e$ ) at CB <sub>1</sub>                                            | (0.446, 0.13, 0.107)        | (0.424, 0.115, 0.094)                             |
| Valley degeneracy of the conduction band CB <sub>1</sub>                                                                    | 6                           | 6                                                 |
| Valley degeneracy of the conduction band K                                                                                  | 2                           | 2                                                 |
| DOS effective mass $m_d^*$ ( $m_e$ ) of the conduction band CB <sub>1</sub>                                                 | 0.6171                      | 0.5481                                            |
| Conductivity effective mass $m_1^*$ ( $m_e$ ) of the conduction band CB <sub>1</sub>                                        | 0.1588                      | 0.1383                                            |
| Lattice elastic constants $c_{11}$ (GPa)                                                                                    | 71.78963                    | 62.49606 (64.2689 <sup>e</sup> )                  |
| Lattice elastic constants $c_{33}$ (GPa)                                                                                    | 77.67787                    | 70.54759 (103.64855 <sup>e</sup> )                |
| Lattice elastic constants $c_{44}$ (GPa)                                                                                    | 15.94614                    | 12.68754 (4.0415 <sup>e</sup> )                   |
| Lattice elastic constants $c_{12}$ (GPa)                                                                                    | 36.60094                    | 33.83294 (36.59395 <sup>e</sup> )                 |
| Lattice elastic constants $c_{13}$ (GPa)                                                                                    | 22.06376                    | 21.25815 (39.53735 <sup>e</sup> )                 |
| Lattice elastic constants $c_{66}$ (GPa)                                                                                    | 13.397369                   | 9.36672                                           |
| Deformation potential constant $\Xi$ (eV)                                                                                   | 42.70515                    | 43.8                                              |
| Carrier mobility $\mu$ (cm <sup>2</sup> V <sup>-1</sup> s <sup>-1</sup> ) along $\Gamma$ -M/ $\Gamma$ -A direction at 300 K | 239.697/259.357             | 280.240/316.344                                   |
| Carrier mobility $\mu$ (cm <sup>2</sup> V <sup>-1</sup> s <sup>-1</sup> ) along $\Gamma$ -M/ $\Gamma$ -A direction at 725 K | 63.802/69.036               | 74.60/84.21                                       |
| Relaxation time $\tau$ ( $\times 10^{-14}$ s) along $\Gamma$ -M/ $\Gamma$ -A direction at 300 K                             | 2.16488/2.34245             | 2.19/2.488                                        |
| Relaxation time $\tau$ ( $\times 10^{-14}$ s) along $\Gamma$ -M/ $\Gamma$ -A direction at 725 K                             | 0.57624/0.6235              | 0.5867/0.66239                                    |
| Bulk modulus <i>B</i> (GPa)                                                                                                 | 42.47642                    | 38.67821                                          |
| Shear modulus <i>G</i> (GPa)                                                                                                | 16.88492                    | 13.03996                                          |
| Transverse elastic wave velocity $v_t$ (m s <sup>-1</sup> )                                                                 | 1840.815                    | 1494.113                                          |
| Longitudinal elastic wave velocity $v_l$ (m s <sup>-1</sup> )                                                               | 3611.459                    | 3098.065                                          |
| Minimum lattice thermal conductivity (W m <sup>-1</sup> K <sup>-1</sup> )                                                   | 0.451702                    | 0.367808 (0.366 <sup>f</sup> )                    |

<sup>a</sup>ref. 3

<sup>b</sup>ref. 4

<sup>c</sup>ref. 5

<sup>d</sup>ref. 6

<sup>e</sup>ref. 7

<sup>f</sup>ref. 2

## Supplementary Notes

### Supplementary Note 1. The Slack's expression

The lattice thermal conductivity can be estimated by Slack's formula<sup>8</sup>

$$\kappa_{\text{lat}} = A \frac{\overline{M} \Theta_D^3 V_{\text{per}}^{1/3}}{\gamma^2 n^{2/3} T} \quad (1)$$

where  $\overline{M}$  is the average atomic mass,  $\Theta_D$  is the Debye temperature,  $V_{\text{per}}$  is the volume per atom,  $n$  is the number of atoms in the primitive cell and  $\gamma$  is the Grüneisen parameter, and  $A$  is a physical constant  $\approx 3.1 \times 10^{-6}$  if  $\kappa_{\text{lat}}$  is in  $\text{W m}^{-1} \text{K}^{-1}$ ,  $\overline{M}$  is in amu, and  $V_{\text{per}}^{1/3}$  is in  $\text{\AA}$ .  $\Theta_D$  is closely related to the averaged sound velocity  $v_s$  and can be given by<sup>9</sup>

$$\Theta_D = \frac{\hbar}{k_B} (6\pi^2 n_a)^{1/3} v_s \quad (2)$$

where  $n_a$  is number density of atoms.  $v_s$  is related to the traverse elastic wave velocity  $v_t$  and the longitudinal elastic wave velocity  $v_l$  and can be written as<sup>10</sup>

$$v_s = \left[ \frac{1}{3} \left( \frac{2}{v_t^3} + \frac{1}{v_l^3} \right) \right]^{-1/3} \quad (3)$$

$$v_t = \sqrt{\frac{G}{\rho}} \quad (4)$$

$$v_l = \sqrt{\left( B + \frac{4}{3} G \right) / \rho} \quad (5)$$

where the bulk modulus  $B$  and shear modulus  $G$  can be calculated by the Voigt-Reuss-Hill averaging scheme in hexagonal system<sup>11</sup>

$$B = (B_V + B_R) / 2 \quad (6)$$

$$G = (G_V + G_R) / 2 \quad (7)$$



$$B_V = \frac{1}{9}(2(c_{11} + c_{12}) + 4c_{13} + c_{33}) \quad (8)$$

$$B_R = \frac{c^2}{M} \quad (9)$$

$$G_V = \frac{1}{30}(M + 12c_{44} + 12c_{66}) \quad (10)$$

$$G_R = \frac{5c^2 c_{44} c_{66}}{2(3B_V c_{44} c_{66} + c^2(c_{44} + c_{66}))} \quad (11)$$

$$M = c_{11} + c_{12} + 2c_{33} - 4c_{13} \quad (12)$$

$$c^2 = (c_{11} + c_{12})c_{33} - 2c_{13}^2 \quad (13)$$

where  $c_{11}$ ,  $c_{33}$ ,  $c_{44}$ ,  $c_{12}$  and  $c_{13}$  are five independent elastic constants in the hexagonal system.

The Grüneisen parameter  $\gamma$  based on the density functional perturbation theory (DFPT) and quasi-harmonic approximation (QHA) can be written as<sup>12</sup>

$$\gamma = \frac{3\beta B V_m}{C_V} \quad (14)$$

where  $\beta$ ,  $B$ , and  $V_m$  are the linear thermal expansion coefficient, the bulk modulus, and the molar volume, respectively, and the isometric heat capacity  $C_V$  can be calculated by<sup>12</sup>

$$C_V = \sum_{n,q} k_B \left( \frac{\hbar \omega_n(q)}{k_B T} \right)^2 \frac{e^{\hbar \omega_n(q)/k_B T}}{(e^{\hbar \omega_n(q)/k_B T} - 1)^2} \quad (15)$$

where  $\omega_n(q)$  is the phonon frequency of the n-th branch with wave vector  $q$ . The input parameters for the calculations are shown in Table S1.

## Supplementary Note 2. The Cahill's expression

The low limit of thermal conductivity is the minimum lattice thermal conductivity, which can be estimated by Cahill's formula<sup>9</sup>

$$\kappa_{\min} = \frac{1}{2} \left[ \left( \frac{\pi}{6} \right)^{1/3} \right] k_B (V)^{-2/3} (2v_t + v_l) \quad (16)$$

Where  $V$ ,  $v_t$ ,  $v_l$  are the average volume per atom, the traverse elastic wave velocity and the longitudinal elastic wave velocity, respectively. The calculated  $\kappa_{\min}$  for  $\text{Mg}_3\text{SbBi}$  is  $0.452 \text{ W m}^{-1} \text{ K}^{-1}$  and the  $\kappa_{\min}$  for  $\text{Mg}_3\text{Bi}_2$  is estimated to be  $0.378 \text{ W m}^{-1} \text{ K}^{-1}$ , which is in well agreement with the previously reported value of  $0.366 \text{ W m}^{-1} \text{ K}^{-1}$ .<sup>1,2</sup>

## Supplementary References

- 1 J. Li, S. Zheng, T. Fang, L. Yue, S. Zhang and G. Lu, *Phys. Chem. Chem. Phys.*, 2018, **20**, 7686-7693.
- 2 H. Tamaki, H. K. Sato and T. Kanno, *Adv. Mater.*, 2016, **28**, 10182-10187.
- 3 K. Imasato, S. D. Kang, S. Ohno and G. J. Snyder, *Mater. Horiz.*, 2018, **5**, 59-64.
- 4 J. Zhang, L. Song, G. K. Madsen, K. F. Fischer, W. Zhang, X. Shi and B. B. Iversen, *Nat. Commun.*, 2016, **7**, 10892.
- 5 L. M. Watson, C. A. W. Marshall and C. P. Cardoso, *J. Phys. F: Met. Phys.*, 1984, **14**, 113.
- 6 M. Sedighi, B. A. Nia, H. Zarringhalam and R. Moradian, *Eur. Phys. J. Appl. Phys.*, 2013, **61**, 10103.
- 7 D. W. Zhou, J. S. Liu, S. H. Xu and P. Peng, *Physica B*, 2010, **405**, 2863–2868.
- 8 G. A. Slack, *J. Phys. Chem. Solids*, 1973, **34**, 321-335.
- 9 D. G. Cahill, S. K. Watson and P. R. Pohl, *Phys. Rev. B: Condens. Matter Mater. Phys.*, 1992, **46**, 6131-6140.
- 10 O. L. Anderson, *J. Phys. Chem. Solids*, 1963, **24**, 909-917.
- 11 Z. J. Wu, E. J. Zhao, H. P. Xiang, X. F. Hao, X. J. Liu and J. Meng, *Phys. Rev. B*, 2007, **76**, 054115.

- 12 T. Fang, S. Zheng, T. Zhou, L. Yan and P. Zhang, *Phys. Chem. Chem. Phys.*, 2017, **19**, 4411-4417.
